# Supplementary material
Source: PubMed Central journal article supplement (PMC6925642)

**Appendix**  
**Impacts of Medicaid Expansion on Health Among Women of Reproductive Age**  
**Margerison et al.**

**Appendix Table 1.** Number and Percent Uninsured/Insured by Maternal Characteristics Among Low-income Women Aged 18–44 Years in the Behavioral Risk Factor Surveillance System (BRFSS), 2011–2012

| Variable                                    | Uninsured<br>n (%) | Insured<br>n (%) |
|---------------------------------------------|--------------------|------------------|
| Overall                                     | 12,325 (37.0)      | 20,971 (63.0)    |
| Race                                        |                    |                  |
| Non-Hispanic white                          | 5,617 (34.4)       | 10,723 (65.6)    |
| Non-Hispanic black                          | 2,067 (33.6)       | 4,086 (66.4)     |
| Hispanic                                    | 3,784 (51.1)       | 3,625 (48.9)     |
| Non-Hispanic other                          | 787 (24.7)         | 2,399 (75.3)     |
| Education                                   |                    |                  |
| Did not graduate high school                | 2,986 (47.7)       | 3,273 (52.3)     |
| Graduated high school                       | 4,533 (37.8)       | 7,452 (62.2)     |
| Attended college                            | 3,533 (32.2)       | 7,427 (67.8)     |
| Graduated college                           | 1,260 (31.1)       | 2,794 (68.9)     |
| Marital status                              |                    |                  |
| Married/Unmarried couple                    | 5,166 (42.6)       | 6,957 (57.4)     |
| Divorced, widowed, separated, never married | 7,113 (33.8)       | 13,941 (66.2)    |
| Dependent children in household?            |                    |                  |
| Yes                                         | 9,820 (36.9)       | 16,782 (63.1)    |

**Appendix**  
**Impacts of Medicaid Expansion on Health Among Women of Reproductive Age**  
**Margerison et al.**

**Appendix Table 2.** Percentage Reporting Outcomes Overall and by Insurance Status Among Low-income Aged Women 18–44 Years in the Behavioral Risk Factor Surveillance System (BRFSS), 2011–2012

| Variable                                                       | Overall<br>n (%) or<br>mean (SE) | Uninsured<br>n (%) or<br>mean (SE) | Insured<br>n (%) or<br>mean (SE) | Difference between<br>uninsured and<br>insured |
|----------------------------------------------------------------|----------------------------------|------------------------------------|----------------------------------|------------------------------------------------|
| <b>Access to health care</b>                                   |                                  |                                    |                                  |                                                |
| Avoided seeking care due to cost                               | 12,605 (37.9)                    | 7,631 (62.1)                       | 4,974 (23.8)                     | 38.3                                           |
| <b>Preventive health care</b>                                  |                                  |                                    |                                  |                                                |
| Check-up in last year                                          | 19,374 (59.0)                    | 4,845 (40.0)                       | 14,529 (70.2)                    | –30.2                                          |
| Ever had blood cholesterol checked                             | 10,134 (60.5)                    | 3,156 (50.6)                       | 6,978 (66.3)                     | –15.7                                          |
| Last cholesterol check in last year                            | 6,381 (64.0)                     | 1,491 (48.0)                       | 4,890 (71.3)                     | –23.3                                          |
| <b>Overall health</b>                                          |                                  |                                    |                                  |                                                |
| Self-rated health good/very good/excellent                     | 25,240 (76.0)                    | 9,273 (75.4)                       | 15,967 (76.3)                    | –0.9                                           |
| Experienced physical health distress in past month             | 5,168 (15.8)                     | 1,598 (13.2)                       | 3,570 (17.3)                     | –4.1                                           |
| Experienced mental health distress in past month               | 8,009 (24.4)                     | 2,730 (22.5)                       | 5,279 (25.5)                     | –3.0                                           |
| <b>Chronic disease</b>                                         |                                  |                                    |                                  |                                                |
| Has been told they have/had high blood pressure                | 2,988 (17.1)                     | 985 (15.2)                         | 2,003 (18.3)                     | –3.1                                           |
| Has been told they have/had high cholesterol                   | 2,396 (23.8)                     | 707 (22.5)                         | 1,689 (24.3)                     | –1.8                                           |
| Has been told they have/had diabetes                           | 1,920 (5.8)                      | 529 (4.3)                          | 1,391 (6.6)                      | –2.3                                           |
| Has been told they have/had prediabetes or borderline diabetes | 822 (6.8)                        | 259 (5.9)                          | 563 (7.3)                        | –1.4                                           |
| Currently taking blood pressure medication <sup>a</sup>        | 1,624 (54.4)                     | 412 (41.9)                         | 1,212 (60.6)                     | –18.7                                          |
| Currently takes insulin <sup>a</sup>                           | 272 (35.5)                       | 61 (27.4)                          | 211 (38.9)                       | –11.5                                          |
| <b>Health behaviors</b>                                        |                                  |                                    |                                  |                                                |
| Smoking cessation attempt in last year <sup>a</sup>            | 6,887 (64.3)                     | 2,499 (63.2)                       | 4,388 (65.0)                     | –1.8                                           |
| Underweight or normal weight vs overweight or obese            | 11,469 (36.8)                    | 4,187 (37.3)                       | 7,282 (36.6)                     | 0.7                                            |
| Binge drinking                                                 | 4,624 (14.8)                     | 1,619 (14.0)                       | 3,005 (15.3)                     | –1.3                                           |
| Heavy drinking                                                 | 1,452 (4.7)                      | 550 (4.8)                          | 902 (4.6)                        | 0.2                                            |

<sup>a</sup>This item was asked to only a subset of the sample based on responses to prior survey items (Appendix Tables 4 and 5).

**Appendix**  
**Impacts of Medicaid Expansion on Health Among Women of Reproductive Age**  
**Margerison et al.**

**Appendix Table 3.** Medicaid Expansion Status of States and Treatment (Expansion/Control/Excluded) in Each Sample

| <b>Medicaid expansion status</b>                                  | <b>States in group</b>                                                                                                                                                       | <b>Treatment in main sample (Table 2)</b> | <b>Treatment in most generous definition (Appendix Table 8)</b> | <b>Treatment in most restrictive definition (Appendix Table 8)</b> | <b>Treatment in exclusion of late expanders (Appendix Table 8)</b> |
|-------------------------------------------------------------------|------------------------------------------------------------------------------------------------------------------------------------------------------------------------------|-------------------------------------------|-----------------------------------------------------------------|--------------------------------------------------------------------|--------------------------------------------------------------------|
| <b>Expanded</b>                                                   |                                                                                                                                                                              |                                           |                                                                 |                                                                    |                                                                    |
| 1. Expanded January 1, 2014; no or limited prior expansion        | Arkansas, Colorado, Illinois, Kentucky, Maryland, New Jersey, Nevada, New Mexico, North Dakota, Ohio, Oregon, Rhode Island, West Virginia                                    | Expansion                                 | Expansion                                                       | Expansion                                                          | Expansion                                                          |
| 2. Expanded January 1, 2014; partial prior expansion              | Arizona, California, Connecticut, Hawaii, Iowa, Minnesota, Washington                                                                                                        | Excluded                                  | Expansion                                                       | Excluded                                                           | Excluded                                                           |
| 3. Expanded in 2014 (after January 1)                             | Michigan, New Hampshire                                                                                                                                                      | Excluded                                  | Expansion                                                       | Excluded                                                           | Excluded                                                           |
| 4. Expanded in 2015                                               | Alaska, Indiana, Pennsylvania                                                                                                                                                | Excluded                                  | Excluded                                                        | Excluded                                                           | Excluded                                                           |
| 5. Expanded in 2016                                               | Louisiana, Montana                                                                                                                                                           | Control                                   | Control                                                         | Control                                                            | Excluded                                                           |
| <b>Control</b>                                                    |                                                                                                                                                                              |                                           |                                                                 |                                                                    |                                                                    |
| 6. Did not expand under ACA and had no or limited prior expansion | Alabama, Florida, Georgia, Idaho, Kansas, Mississippi, Missouri, Nebraska, North Carolina, Oklahoma, South Carolina, South Dakota, Tennessee, Texas, Utah, Virginia, Wyoming | Control                                   | Control                                                         | Control                                                            | Control                                                            |
| 7. Did not expand under ACA and                                   | Maine, Wisconsin                                                                                                                                                             | Control                                   | Control                                                         | Excluded                                                           | Control                                                            |

**Appendix**  
**Impacts of Medicaid Expansion on Health Among Women of Reproductive Age**  
**Margerison et al.**

---

|                             |                              |                                                           |         |         |          |         |
|-----------------------------|------------------------------|-----------------------------------------------------------|---------|---------|----------|---------|
| had partial prior expansion |                              |                                                           |         |         |          |         |
| 8.                          | Full expansion prior to 2014 | Delaware, Washington DC, Massachusetts, New York, Vermont | Control | Control | Excluded | Control |

---

ACA, Affordable Care Act.

**Appendix**  
**Impacts of Medicaid Expansion on Health Among Women of Reproductive Age**  
**Margerison et al.**

**Appendix Table 4.** Original Behavioral Risk Factor Surveillance System (BRFSS) Questions for Variables

| <b>Variable name</b>                               | <b>Original question</b>                                                                                                                                              | <b>Measurement</b>                    |
|----------------------------------------------------|-----------------------------------------------------------------------------------------------------------------------------------------------------------------------|---------------------------------------|
| <b>Insurance coverage</b>                          |                                                                                                                                                                       |                                       |
| Healthcare coverage                                | Do you have any kind of health care coverage, including health insurance, prepaid plans such as HMOs, or government plans such as Medicare, or Indian Health Service? | Yes/no                                |
| <b>Access to health care</b>                       |                                                                                                                                                                       |                                       |
| Avoided seeking care due to cost                   | Was there a time in the past 12 months when you needed to see a doctor but could not because of cost?                                                                 | Yes/no                                |
| <b>Preventive health care</b>                      |                                                                                                                                                                       |                                       |
| Check-up in last year                              | About how long has it been since you last visited a doctor for a routine checkup?                                                                                     | Within past year<br>yes/no            |
| Ever had blood cholesterol checked                 | Have you EVER had your blood cholesterol checked?                                                                                                                     | Yes/no                                |
| Last cholesterol check within past year            | About how long has it been since you last had your blood cholesterol checked?                                                                                         | Within past year<br>yes/no            |
| <b>Overall health</b>                              |                                                                                                                                                                       |                                       |
| Self-rated health good/very good/excellent         | Would you say in general your health is excellent/very good/good/fair/poor?                                                                                           | Excellent/very good/good vs fair/poor |
| Experienced physical health distress in past month | For how many days during the past 30 days was your physical health not good?                                                                                          | <14 days / ≥14 days                   |
| Experienced mental health distress in past month   | For how many days during the past 30 days was your mental health not good?                                                                                            | <14 days / ≥14 days                   |
| <b>Chronic disease</b>                             |                                                                                                                                                                       |                                       |
| Ever been told that blood pressure is high         | Have you ever been told by a doctor, nurse or other health professional that you have high blood pressure?                                                            | Yes/no                                |
| Ever been told cholesterol is high                 | Have you ever been told by a doctor, nurse, or other health professional that your blood cholesterol is high?                                                         | Yes/no                                |
| Ever been told diabetic                            | Have you ever been told by a doctor, nurse, or other health professional that your blood cholesterol is high?                                                         | Yes/no                                |
| Ever been told pre-diabetic                        | Have you ever been told by a doctor, nurse, or other health professional that you have pre-diabetes or borderline diabetes?                                           | Yes/no                                |

**Appendix**  
**Impacts of Medicaid Expansion on Health Among Women of Reproductive Age**  
**Margerison et al.**

|                                                     |                                                                                                                    |                                                                                                                                                                                    |
|-----------------------------------------------------|--------------------------------------------------------------------------------------------------------------------|------------------------------------------------------------------------------------------------------------------------------------------------------------------------------------|
| Currently taking blood pressure medication          | Are you currently taking medicine for your high blood pressure?                                                    | Yes/no                                                                                                                                                                             |
| Currently takes insulin                             | Are you now taking insulin?                                                                                        | Yes/no                                                                                                                                                                             |
| Health behaviors                                    |                                                                                                                    |                                                                                                                                                                                    |
| Smoking cessation attempt in past 12 months         | During the past 12 months, have you stopped smoking for one day or longer because you were trying to quit smoking? | Yes/no                                                                                                                                                                             |
| Underweight or normal weight vs overweight or obese | Based on BMI calculated from self-reported weight and height                                                       | Underweight (<18.5 kg/m <sup>2</sup> )<br>Normal weight (18.5 to <25.0 kg/m <sup>2</sup> )<br>Overweight (25.0 to <30 kg/m <sup>2</sup> )<br>Obese (30 kg/m <sup>2</sup> or above) |
| Binge drinking                                      | ≥5 drinks for males/ ≥4 drinks for females on one occasion in past 30 days                                         | Yes/no                                                                                                                                                                             |
| Heavy drinking                                      | >14 drinks for males / >7 drinks for females per week in past 30 days                                              | Yes/no                                                                                                                                                                             |

**Appendix**  
**Impacts of Medicaid Expansion on Health Among Women of Reproductive Age**  
**Margerison et al.**

**Appendix Table 5.** Number Available and Denominator for Each Outcome

| <b>Variable name</b>                               | <b>Denominator</b>                                                                                        | <b>Years asked</b> | <b>Number missing from denominator</b> |
|----------------------------------------------------|-----------------------------------------------------------------------------------------------------------|--------------------|----------------------------------------|
| <b>Insurance</b>                                   |                                                                                                           |                    |                                        |
| Healthcare coverage                                | All                                                                                                       | All                | 185                                    |
| <b>Access to care</b>                              |                                                                                                           |                    |                                        |
| Avoided seeking care due to cost                   | All                                                                                                       | All                | 130                                    |
| <b>Preventive health care</b>                      |                                                                                                           |                    |                                        |
| Check-up in last year                              | All                                                                                                       | All                | 943                                    |
| Ever had blood cholesterol checked                 | All                                                                                                       | 2011, 2013, 2015   | 1,492                                  |
| Last cholesterol check within past year            | Among those who ever had a cholesterol check, n=20,901                                                    | 2011, 2013, 2015   | 344                                    |
| <b>Overall health</b>                              |                                                                                                           |                    |                                        |
| Self-rated health good/very good/excellent         | All                                                                                                       | All                | 154                                    |
| Experienced physical health distress in past month | All                                                                                                       | All                | 1,002                                  |
| Experienced mental health distress in past month   | All                                                                                                       | All                | 782                                    |
| <b>Chronic disease</b>                             |                                                                                                           |                    |                                        |
| Ever been told that blood pressure is high         | All                                                                                                       | 2011, 2013, 2015   | 58                                     |
| Ever been told cholesterol is high                 | Among those who ever had a cholesterol check, n=20,901                                                    | 2011, 2013, 2015   | 95                                     |
| Ever been told diabetic                            | All                                                                                                       | All                | 114                                    |
| Ever been told pre-diabetic                        | Among those without a diabetes diagnosis, n=54,875                                                        | All                | 31,847                                 |
| Currently taking blood pressure medication         | Among those with high blood pressure, n=6,316                                                             | 2011, 2013, 2015   | 5                                      |
| Currently takes insulin                            | Among those with a diabetes diagnosis, n=3,490                                                            | All                | 2,112                                  |
| <b>Health behaviors</b>                            |                                                                                                           |                    |                                        |
| Smoking cessation attempt in past 12 months        | Among those who have ever smoked at least 100 cigarettes and currently smoke at least some days, n=18,298 | All                | 43                                     |

**Appendix**  
**Impacts of Medicaid Expansion on Health Among Women of Reproductive Age**  
**Margerison et al.**

|                                                        |     |     |       |
|--------------------------------------------------------|-----|-----|-------|
| Underweight or normal weight vs<br>overweight or obese | All | All | 4,001 |
| Binge drinking                                         | All | All | 3,008 |
| Heavy drinking                                         | All | All | 3,094 |



**Appendix**  
**Impacts of Medicaid Expansion on Health Among Women of Reproductive Age**  
**Margerison et al.**

**Appendix Table 6.** Interaction *P*-Value From Parallel Trends Tests. *P*-Values <0.05 Indicate Rejection of the Null Hypothesis That Trends in the Outcome Were Parallel for Expansion and Control States Prior to the Medicaid Expansion

| <b>Outcome</b>                                                                                                    | <b>Unadjusted<sup>a</sup></b> | <b>Adjusted<sup>b</sup></b> |
|-------------------------------------------------------------------------------------------------------------------|-------------------------------|-----------------------------|
|                                                                                                                   | <b>Interaction p-value</b>    |                             |
| <b>Insurance</b>                                                                                                  |                               |                             |
| Has healthcare coverage                                                                                           | 0.2024                        | 0.1707                      |
| <b>Access to health care</b>                                                                                      |                               |                             |
| Avoided seeking care due to cost                                                                                  | 0.2212                        | 0.1305                      |
| <b>Preventive health care</b>                                                                                     |                               |                             |
| Check-up in last year                                                                                             | 0.0236                        | 0.0240                      |
| Ever had blood cholesterol checked                                                                                | 0.2531                        | 0.4348                      |
| Last cholesterol check within past year <sup>c</sup>                                                              | 0.0000                        | 0.0002                      |
| <b>Overall health</b>                                                                                             |                               |                             |
| Had good or better health                                                                                         | 0.0083                        | 0.0097                      |
| Experienced physical health distress in past month                                                                | 0.0434                        | 0.0422                      |
| Experienced mental health distress in past month                                                                  | 0.4659                        | 0.3621                      |
| <b>Chronic disease</b>                                                                                            |                               |                             |
| Ever been told that blood pressure is high                                                                        | 0.5231                        | 0.8714                      |
| Ever been told cholesterol is high                                                                                | 0.6949                        | 0.6729                      |
| Ever been told diabetic                                                                                           | 0.3471                        | 0.4403                      |
| Ever been told pre-diabetic                                                                                       | 0.7927                        | 0.6481                      |
| Currently taking blood pressure medication                                                                        | 0.5204                        | 0.4731                      |
| Currently takes insulin <sup>c</sup>                                                                              | 0.2159                        | 0.0849                      |
| <b>Health behaviors</b>                                                                                           |                               |                             |
| Has stopped smoking for one day or longer because they were trying to quit smoking in past 12 months <sup>c</sup> | 0.9760                        | 0.9571                      |
| Underweight or normal weight vs overweight or obese                                                               | 0.0919                        | 0.0191                      |
| Binge drinkers                                                                                                    | 0.6237                        | 0.3133                      |
| Heavy drinkers                                                                                                    | 0.9389                        | 0.7950                      |

<sup>a</sup>To test the parallel trends assumption, we fit a series of regression models as follows, using only data from the pre-expansion period:

$$Y_{ist} = \beta_0 + \beta_{1t}(expansion \times year_t) + Year'_t\beta_2 + State'_s\beta_3 + \varepsilon_{ist}$$

**Appendix**  
**Impacts of Medicaid Expansion on Health Among Women of Reproductive Age**  
**Margerison et al.**

$Y_{ist}$  represents the health outcome of interest for woman  $i$  in state  $s$  and year  $t$ .  $Expansion$  is a 0/1 indicator of whether the woman lives in an expansion or control state, and  $Year_t$  is a vector of year fixed effects. The null is the joint hypothesis that coefficients on all pre-expansion year interactions between expansion and year dummy variables are zero.

<sup>b</sup>For adjusted parallel trends analysis, we use the following model:

$$Y_{ist} = \beta_0 + \beta_1(Expansion_s \times Post) + Year'_t \beta_2 + State'_s \beta_3 + X'_{ist} \beta_4 + \beta_5 Z_{st} + \varepsilon_{ist}$$

where  $Y_{ist}$  represents the health outcome of interest for woman  $i$  in state  $s$  and year  $t$ .  $Expansion$  is a 0/1 indicator of whether the woman lives in an expansion or control state;  $post$ , a 0/1 indicator for whether the outcome is measured pre- or post-expansion;  $Year_t$  and  $State_s$  are vectors of year and state fixed effects;  $X_{ist}$  is a vector of individual covariates (age group, race/ethnicity, household income, educational attainment, employment status, marital status, household size, and whether or not the woman has dependent children in the household); and  $Z_{st}$  is the quarterly average state unemployment rate. The null is the joint hypothesis that coefficients on all pre-expansion year interactions between expansion and year dummy variables are zero.

<sup>c</sup>This item was asked to only a subset of the sample (Appendix Tables 4 and 5).

**Appendix**  
**Impacts of Medicaid Expansion on Health Among Women of Reproductive Age**  
**Margerison et al.**

**Appendix Table 7.** Multivariate Adjusted<sup>a</sup> Percentage Difference-in-Difference (DID) Estimates of Medicaid Expansion's Association With Outcomes Among All Women in 38 States and Washington DC (N=58,365) and Stratified by 5-Year Age Group

| Outcome                                                 | 18–24 years               | 25–29 years            | 30–44 years               |
|---------------------------------------------------------|---------------------------|------------------------|---------------------------|
|                                                         | DID estimate (95% CI)     | DID estimate (95% CI)  | DID estimate (95% CI)     |
| <b>Health insurance</b>                                 |                           |                        |                           |
| Has healthcare coverage                                 | <b>8.7 (3.7, 13.7)</b>    | <b>9.4 (1.8, 17.0)</b> | <b>9.1 (2.6, 15.6)</b>    |
| <b>Access to health care</b>                            |                           |                        |                           |
| Avoided seeking care due to cost                        | <b>-6.4 (-12.3, -0.5)</b> | -6.4 (-13.4, 0.6)      | <b>-8.1 (-12.6, -3.5)</b> |
| <b>Preventive health care</b>                           |                           |                        |                           |
| Check-up in last year                                   | 4.1 (-0.2, 8.5)           | <b>6.8 (2.9, 10.8)</b> | <b>5.0 (0.9, 9.1)</b>     |
| Ever had blood cholesterol checked                      | <b>7.0 (0.3, 13.6)</b>    | 2.9 (-4.5, 10.3)       | 1.1 (-1.7, 4.0)           |
| Last cholesterol check within a year                    | 0.0 (-8.9, 8.8)           | 4.6 (-2.9, 12.1)       | 3.7 (-0.7, 8.1)           |
| <b>Overall health</b>                                   |                           |                        |                           |
| Self-rated health good/very good/excellent              | 0.8 (-2.2, 3.8)           | 1.8 (-1.4, 5.0)        | <b>2.8 (0.0, 5.6)</b>     |
| Experienced physical health distress in past month      | -0.7 (-3.2, 1.8)          | -2.0 (-4.8, 0.7)       | -0.8 (-2.6, 1.1)          |
| Experienced mental health distress in past month        | -1.7 (-5.2, 1.7)          | -0.2 (-4.5, 4.0)       | -1.2 (-3.2, 0.9)          |
| <b>Chronic disease</b>                                  |                           |                        |                           |
| Told high blood pressure                                | 2.6 (-0.5, 5.7)           | 0.5 (-4.3, 5.3)        | -1.8 (-4.9, 1.3)          |
| Told high cholesterol                                   | -0.1 (-4.8, 4.5)          | -0.5 (-5.1, 4.1)       | -1.8 (-4.6, 1.1)          |
| Told diabetes                                           | 0.4 (-0.5, 1.3)           | -0.7 (-2.4, 0.9)       | -0.5 (-1.5, 0.6)          |
| Told prediabetes                                        | 0.6 (-1.3, 2.4)           | 1.1 (-2.5, 4.8)        | -1.0 (-4.1, 2.0)          |
| Currently taking blood pressure medication <sup>b</sup> | 17.1 (-0.5, 34.7)         | 0.5 (-17.4, 18.5)      | <b>7.5 (2.0, 13.1)</b>    |
| Currently takes insulin <sup>b</sup>                    | -71.7 (-178.2, 34.7)      | -22.6 (-86.1, 41.0)    | <b>12.8 (4.5, 21.1)</b>   |
| <b>Health behaviors</b>                                 |                           |                        |                           |
| Smoking cessation attempt in last year <sup>b</sup>     | 0.8 (-12.7, 14.4)         | -0.1 (-7.2, 6.9)       | -0.1 (-3.8, 3.6)          |
| Underweight/normal vs overweight/obese                  | 0.7 (-4.1, 5.5)           | -1.0 (-4.2, 2.2)       | -0.2 (-2.7, 2.4)          |
| Binge drinking                                          | -1.2 (-4.6, 2.2)          | 0.2 (-3.2, 3.7)        | -1.3 (-3.3, 0.7)          |
| Heavy drinking                                          | -2.2 (-4.2, -0.1)         | 1.5 (-0.6, 3.6)        | -1.5 (-2.4, 0.6)          |

Note: Boldface indicates statistical significance ( $p < 0.05$ ).

<sup>a</sup>Models additionally adjusted for state, year, race, education, marital status, dependent children, age group, employment status, household size, income group, and state average unemployment rate.

<sup>b</sup>This item was asked to only a subset of the sample (Appendix Tables 4 and 5).

**Appendix**  
**Impacts of Medicaid Expansion on Health Among Women of Reproductive Age**  
**Margerison et al.**

**Appendix Table 8.** Multivariate Adjusted<sup>a</sup> Estimates for Associations Between Simulated Probability of Eligibility for Medicaid and Outcomes in All States (n=282,869)

| Outcome                                                 | All women                 | Married                    | Not married               | Dependent children        | No dependent children     |
|---------------------------------------------------------|---------------------------|----------------------------|---------------------------|---------------------------|---------------------------|
|                                                         | DID estimate (95% CI)     | DID estimate (95% CI)      | DID estimate (95% CI)     | DID estimate (95% CI)     | DID estimate (95% CI)     |
| <b>Health insurance</b>                                 |                           |                            |                           |                           |                           |
| Has healthcare coverage                                 | <b>12.6 (6.7, 18.5)</b>   | <b>21.1 (11.1, 31.1)</b>   | <b>10.8 (5.5, 16.1)</b>   | <b>14.4 (6.4, 22.3)</b>   | <b>10.5 (5.7, 15.3)</b>   |
| <b>Access to health care</b>                            |                           |                            |                           |                           |                           |
| Avoided seeking care due to cost                        | <b>-7.8 (-13.0, -2.5)</b> | <b>-10.9 (-18.8, -2.9)</b> | <b>-7.1 (-12.1, -2.1)</b> | <b>-9.3 (-16.6, -2.1)</b> | <b>-6.4 (-10.3, -2.5)</b> |
| <b>Preventive health care</b>                           |                           |                            |                           |                           |                           |
| Check-up in last year                                   | <b>5.4 (0.4, 10.4)</b>    | <b>12.1 (3.5, 20.7)</b>    | 4.0 (-0.7, 8.6)           | <b>6.6 (0.7, 12.5)</b>    | 4.4 (-1.2, 10.0)          |
| Ever had blood cholesterol checked                      | -1.6 (-5.7, 2.5)          | -5.2 (-14.1, 3.7)          | -0.8 (-5.9, 4.2)          | -1.4 (-7.6, 4.8)          | -1.8 (-7.9, 4.3)          |
| Last cholesterol check within a year                    | 5.4 (-0.8, 11.7)          | 14.2 (-0.2, 28.6)          | 3.3 (-3.9, 10.6)          | 5.8 (-1.8, 13.4)          | 6.7 (-2.1, 15.5)          |
| <b>Overall health</b>                                   |                           |                            |                           |                           |                           |
| Self-rated health good/very good/excellent              | 1.9 (-0.2, 4.0)           | 2.0 (-2.4, 6.4)            | 1.9 (-0.3, 4.0)           | 2.9 (-0.6, 6.3)           | 0.3 (-2.1, 2.8)           |
| Experienced physical health distress in past month      | -0.1 (-1.9, 1.6)          | 1.0 (-2.7, 4.8)            | -0.4 (-2.3, 1.6)          | -1.9 (-4.1, 0.3)          | <b>2.2 (0.3, 4.1)</b>     |
| Experienced mental health distress in past month        | -1.3 (-3.7, 1.0)          | -0.1 (-5.2, 5.1)           | -1.6 (-4.1, 0.9)          | -0.9 (-4.4, 2.5)          | -1.9 (-4.8, 1.0)          |
| <b>Chronic disease</b>                                  |                           |                            |                           |                           |                           |
| Told high blood pressure                                | 1.1 (-1.9, 4.2)           | 5.7 (-1.5, 13.0)           | 0.2 (-2.7, 3.1)           | -0.1 (-3.6, 3.3)          | 2.7 (-1.7, 7.0)           |
| Told high cholesterol                                   | 1.9 (-1.2, 5.0)           | 8.0 (-0.4, 16.4)           | 0.4 (-2.8, 3.7)           | 2.6 (-2.1, 7.4)           | -0.2 (-4.7, 4.3)          |
| Told diabetes                                           | 0.0 (-0.7, 0.7)           | 1.1 (-0.8, 3.0)            | -0.2 (-1.0, 0.6)          | -0.1 (-1.5, 1.2)          | 0.2 (-0.9, 1.4)           |
| Told prediabetes                                        | 0.2 (-3.3, 3.7)           | -1.2 (-7.3, 4.9)           | 0.5 (-3.2, 4.3)           | 0.4 (-3.5, 4.2)           | -0.1 (-4.8, 4.7)          |
| Currently taking blood pressure medication <sup>b</sup> | 1.7 (-9.6, 13.0)          | 2.4 (-27.4, 32.3)          | 1.5 (-13.5, 16.5)         | -6.3 (-19.6, 7.0)         | 12.7 (-9.2, 34.7)         |
| Currently takes insulin <sup>b</sup>                    | 1.2 (-33.9, 36.4)         | -0.1 (-80.6, 80.4)         | 1.7 (-37.9, 41.2)         | 11.0 (-35.4, 57.4)        | -2.5 (-83.6, 78.5)        |
| <b>Health behaviors</b>                                 |                           |                            |                           |                           |                           |
| Smoking cessation attempt in last year <sup>b</sup>     | 2.7 (-2.3, 7.8)           | <b>13.9 (1.5, 26.3)</b>    | 0.5 (-4.7, 5.6)           | 4.8 (-4.5, 14.0)          | -7.3 (-17.0, 2.4)         |
| Underweight/normal vs overweight/obese                  | -0.0 (-2.7, 2.7)          | -0.9 (-8.2, 6.5)           | 0.2 (-2.6, 2.9)           | -0.0 (-3.8, 3.8)          | 0.2 (-4.6, 5.0)           |
| Binge drinking                                          | -1.3 (-4.0, 1.3)          | 4.5 (-0.4, 9.4)            | -2.6 (-5.6, 0.4)          | 0.4 (-2.8, 3.5)           | -3.3 (-7.3, 0.7)          |
| Heavy drinking                                          | -1.1 (-2.7, 0.5)          | 0.6 (-2.2, 3.3)            | -1.5 (-3.3, 0.3)          | -0.7 (-2.7, 1.3)          | -1.6 (-4.2, 1.1)          |

Note: Boldface indicates statistical significance ( $p < 0.05$ ).

<sup>a</sup>Models additionally adjusted for demographic subgroup-by-state and subgroup-by-year fixed effects.

<sup>b</sup>This item was asked to only a subset of the sample (Appendix Tables 4 and 5).

**Appendix**  
**Impacts of Medicaid Expansion on Health Among Women of Reproductive Age**  
**Margerison et al.**

**Appendix Table 9.** Comparison of Difference-in-Difference (DID) Estimates of Medicaid Expansion's Association With Outcomes Using Different Definitions of Expansion and Control States

| Outcome                                                 | Current definition <sup>a</sup><br>(corresponds to<br>results in Table 2) | Most generous<br>definition <sup>b</sup> | Most restrictive<br>definition <sup>c</sup> | Exclusion of late<br>expanders <sup>d</sup> |
|---------------------------------------------------------|---------------------------------------------------------------------------|------------------------------------------|---------------------------------------------|---------------------------------------------|
|                                                         | DID Estimate<br>(95% CI)                                                  | DID Estimate<br>(95% CI)                 | DID Estimate<br>(95% CI)                    | DID Estimate<br>(95% CI)                    |
| <b>Health insurance</b>                                 |                                                                           |                                          |                                             |                                             |
| Has healthcare coverage                                 | <b>9.0 (2.9, 15.2)</b>                                                    | <b>5.1 (0.5, 9.8)</b>                    | <b>7.5 (1.4, 13.6)</b>                      | <b>9.2 (3.0, 15.5)</b>                      |
| <b>Access to health care</b>                            |                                                                           |                                          |                                             |                                             |
| Avoided seeking care due to cost                        | <b>-7.4 (-12.2, -2.6)</b>                                                 | <b>-5.3 (-9.1, -1.6)</b>                 | <b>-5.9 (-10.6, -1.1)</b>                   | <b>-7.5 (-12.3, -2.6)</b>                   |
| <b>Preventive health care</b>                           |                                                                           |                                          |                                             |                                             |
| Check-up in last year                                   | <b>5.1 (1.8, 8.4)</b>                                                     | 2.4 (-1.1, 5.8)                          | <b>4.3 (0.8, 7.7)</b>                       | <b>5.2 (1.9, 8.5)</b>                       |
| Ever had blood cholesterol checked                      | 2.2 (-0.7, 5.1)                                                           | 1.4 (-0.9, 3.6)                          | 2.4 (-0.7, 5.5)                             | 2.6 (-0.3, 5.5)                             |
| Last cholesterol check within a year                    | 3.6 (-0.1, 7.2)                                                           | 0.7 (-3.0, 4.3)                          | 2.8 (-1.0, 6.6)                             | 3.4 (-0.3, 7.1)                             |
| <b>Overall health</b>                                   |                                                                           |                                          |                                             |                                             |
| Self-rated health good/very good/excellent              | <b>2.3 (0.3, 4.3)</b>                                                     | <b>2.1 (0.5, 3.6)</b>                    | 1.8 (-0.4, 3.9)                             | <b>2.5 (0.5, 4.6)</b>                       |
| Experienced physical health distress in past month      | -1.0 (-2.6, 0.5)                                                          | -0.6 (-1.7, 0.6)                         | -0.8 (-2.4, 0.8)                            | -1.1 (-2.7, 0.5)                            |
| Experienced mental health distress in past month        | -1.1 (-3.0, 0.7)                                                          | -1.3 (-2.8, 0.2)                         | -0.7 (-2.6, 1.2)                            | -1.2 (-3.0, 0.7)                            |
| <b>Chronic disease</b>                                  |                                                                           |                                          |                                             |                                             |
| Told high blood pressure                                | -0.6 (-3.2, 1.9)                                                          | 0.1 (-1.6, 1.8)                          | -0.6 (-3.2, 2.0)                            | -0.7 (-3.3, 1.9)                            |
| Told high cholesterol                                   | -1.6 (-3.6, 0.5)                                                          | 1.2 (-1.1, 3.6)                          | -1.3 (-3.5, 0.9)                            | -1.6 (-3.7, 0.5)                            |
| Told diabetes                                           | -0.4 (-1.1, 0.3)                                                          | -0.4 (-1.1, 0.3)                         | -0.3 (-1.0, 0.4)                            | -0.4 (-1.1, 0.4)                            |
| Told prediabetes                                        | -0.3 (-2.7, 2.0)                                                          | -0.2 (-2.4, 1.9)                         | -0.4 (-2.9, 2.1)                            | -0.3 (-2.7, 2.2)                            |
| Currently taking blood pressure medication <sup>e</sup> | <b>7.9 (3.1, 12.8)</b>                                                    | <b>5.5 (0.9, 10.0)</b>                   | <b>7.9 (2.7, 13.1)</b>                      | <b>7.9 (3.0, 12.9)</b>                      |
| Currently takes insulin <sup>e</sup>                    | <b>11.4 (3.0, 19.7)</b>                                                   | 8.7 (-1.9, 19.3)                         | <b>9.9 (1.8, 18.1)</b>                      | <b>12.6 (3.8, 21.3)</b>                     |
| <b>Health behaviors</b>                                 |                                                                           |                                          |                                             |                                             |
| Smoking cessation attempt in last year <sup>e</sup>     | 0.3 (-3.3, 3.9)                                                           | -0.7 (-3.5, 2.0)                         | -0.1 (-3.8, 3.6)                            | 0.7 (-2.9, 4.3)                             |
| Underweight/normal BMI vs overweight/obese              | -0.3 (-1.9, 1.4)                                                          | 0.1 (-1.1, 1.2)                          | -0.3 (-1.9, 1.3)                            | -0.3 (-2.0, 1.4)                            |
| Binge drinking                                          | -0.8 (-2.3, 0.6)                                                          | -0.3 (-1.6, 1.0)                         | -0.7 (-2.3, 0.8)                            | -0.9 (-2.4, 0.6)                            |
| Heavy drinking                                          | -1.0 (-1.8, -0.2)                                                         | -0.4 (-1.2, 0.3)                         | -0.9 (-1.7, -0.2)                           | <b>-1.0 (-1.8, -0.2)</b>                    |

Note: Boldface indicates statistical significance ( $p < 0.05$ ).

<sup>a</sup>Models additionally adjusted for state, year, race, education, marital status, dependent children, age group, employment status, household size, income group, and state average unemployment rate.

**Appendix**  
**Impacts of Medicaid Expansion on Health Among Women of Reproductive Age**  
**Margerison et al.**

Defines expansion states as those that expanded under the ACA on January 1, 2014 with no or limited prior expansion. Defines control states as those that did not expand under the ACA in 2014 or 2015 (with no or very limited prior expansions, or with partial prior expansions), or had full expansions prior to 2014.

<sup>b</sup>Defines expansion states as those that expanded under the ACA on January 1, 2014 (with no or limited prior expansion, or with partial prior expansions), or expanded in 2014 but after January 1. Defines control states as those that did not expand under the ACA in 2014 or 2015 (with no or very limited prior expansions, or with partial prior expansions), or had full expansions prior to 2014.

<sup>c</sup>Defines expansion states as those that expanded under the ACA on January 1, 2014 with no or limited prior expansion. Defines control states as those that did not expand under the ACA in 2014 or 2015 and had no or very limited prior expansions.

<sup>d</sup>Same definition of expansion and control states as used in main analysis and in subscript *a* above, but states expanding in 2016 (Louisiana and Montana) are excluded.

<sup>e</sup>This item was asked to only a subset of the sample (Appendix Tables 4 and 5).

ACA, Affordable Care Act.

**Appendix**  
**Impacts of Medicaid Expansion on Health Among Women of Reproductive Age**  
**Margerison et al.**

**Appendix Table 10.** Multivariate Adjusted<sup>a</sup> Estimates From Tables 2, 3, and Appendix Table 6 With Application of BRFSS Weights

| <b>Outcome</b>                                          | <b>Medicaid expansion analysis (Table 2)<br/>(n=58,365)</b> | <b>Simulated eligibility analysis in 38 states + DC (Table 3)<br/>(n=212,325)</b> | <b>Simulated eligibility analysis in all states (Appendix Table 6)<br/>(n=282,869)</b> |
|---------------------------------------------------------|-------------------------------------------------------------|-----------------------------------------------------------------------------------|----------------------------------------------------------------------------------------|
| <b>Health insurance</b>                                 |                                                             |                                                                                   |                                                                                        |
| Has healthcare coverage                                 | <b>7.4 (1.3, 13.4)</b>                                      | <b>13.4 (6.2, 20.5)</b>                                                           | <b>10.2 (5.3, 15.2)</b>                                                                |
| <b>Access to health care</b>                            |                                                             |                                                                                   |                                                                                        |
| Avoided seeking care due to cost                        | -4.2 (-8.8, 0.3)                                            | <b>-7.7 (-13.5, -1.9)</b>                                                         | <b>-5.8 (-9.6, -2.0)</b>                                                               |
| <b>Preventive health care</b>                           |                                                             |                                                                                   |                                                                                        |
| Check-up in last year                                   | <b>3.9 (0.6, 7.2)</b>                                       | <b>5.8 (0.5, 11.1)</b>                                                            | <b>4.1 (0.5, 7.6)</b>                                                                  |
| Ever had blood cholesterol checked                      | <b>5.0 (0.0, 10.0)</b>                                      | 7.4 (-0.3, 15.0)                                                                  | 2.4 (-4.9, 9.6)                                                                        |
| Last cholesterol check within a year                    | -0.6 (-6.7, 5.6)                                            | 2.0 (-9.3, 13.3)                                                                  | 1.2 (-5.8, 8.2)                                                                        |
| <b>Overall health</b>                                   |                                                             |                                                                                   |                                                                                        |
| Self-rated health good/very good/excellent              | 1.1 (-1.7, 3.9)                                             | 1.3 (-1.3, 3.8)                                                                   | 1.6 (-0.4, 3.5)                                                                        |
| Experienced physical health distress in past month      | -0.4 (-3.5, 2.6)                                            | -0.7 (-2.9, 1.5)                                                                  | -0.3 (-2.3, 1.8)                                                                       |
| Experienced mental health distress in past month        | -1.8 (-5.7, 2.2)                                            | <b>-5.2 (-9.3, -1.1)</b>                                                          | <b>-5.5 (-8.7, -2.3)</b>                                                               |
| <b>Chronic disease</b>                                  |                                                             |                                                                                   |                                                                                        |
| Told high blood pressure                                | 0.7 (-3.1, 4.6)                                             | -1.2 (-5.7, 3.3)                                                                  | -0.9 (-3.9, 2.2)                                                                       |
| Told high cholesterol                                   | 0.1 (-5.8, 6.0)                                             | -0.4 (-7.6, 6.8)                                                                  | -0.7 (-6.3, 4.9)                                                                       |
| Told diabetes                                           | -0.2 (-1.5, 1.1)                                            | 0.2 (-1.8, 2.2)                                                                   | 0.5 (-0.8, 1.7)                                                                        |
| Told prediabetes                                        | 1.2 (-1.7, 4.1)                                             | -1.6 (-6.4, 3.3)                                                                  | -1.1 (-5.3, 3.1)                                                                       |
| Currently taking blood pressure medication <sup>b</sup> | 0.2 (-9.6, 9.9)                                             | -3.4 (-23.2, 16.3)                                                                | 10.7 (-7.9, 29.2)                                                                      |
| Currently takes insulin <sup>b</sup>                    | 0.8 (-12.6, 14.2)                                           | 51.2 (-21.7, 124.1)                                                               | 44.9 (-4.8, 94.5)                                                                      |
| <b>Health behaviors</b>                                 |                                                             |                                                                                   |                                                                                        |

**Appendix**  
**Impacts of Medicaid Expansion on Health Among Women of Reproductive Age**  
**Margerison et al.**

|                                                     |                          |                            |                          |
|-----------------------------------------------------|--------------------------|----------------------------|--------------------------|
| Smoking cessation attempt in last year <sup>b</sup> | -0.2 (-5.2, 4.8)         | <b>-10.7 (-20.4, -1.0)</b> | -6.6 (-14.2, 1.1)        |
| Underweight or normal weight vs overweight or obese | -0.6 (-2.2, 1.0)         | -2.9 (-7.8, 2.0)           | -0.4 (-4.4, 3.6)         |
| Binge drinking                                      | -0.9 (-2.8, 0.9)         | <b>-7.8 (-12.6, -2.9)</b>  | <b>-5.4 (-8.9, -1.8)</b> |
| Heavy drinking                                      | <b>-1.9 (-3.0, -0.9)</b> | <b>-3.4 (-6.8, -0.0)</b>   | -3.2 (-6.4, 0.1)         |

*Note:* Boldface indicates statistical significance ( $p < 0.05$ ).

<sup>a</sup>Models additionally adjusted for state, year, race, education, marital status, dependent children, age group, employment status, household size, income group, and state average unemployment rate.

<sup>b</sup>This item was asked to only a subset of the sample (Appendix Tables 4 and 5).



### Parallel Trends Assumption Check: Healthcare Coverage

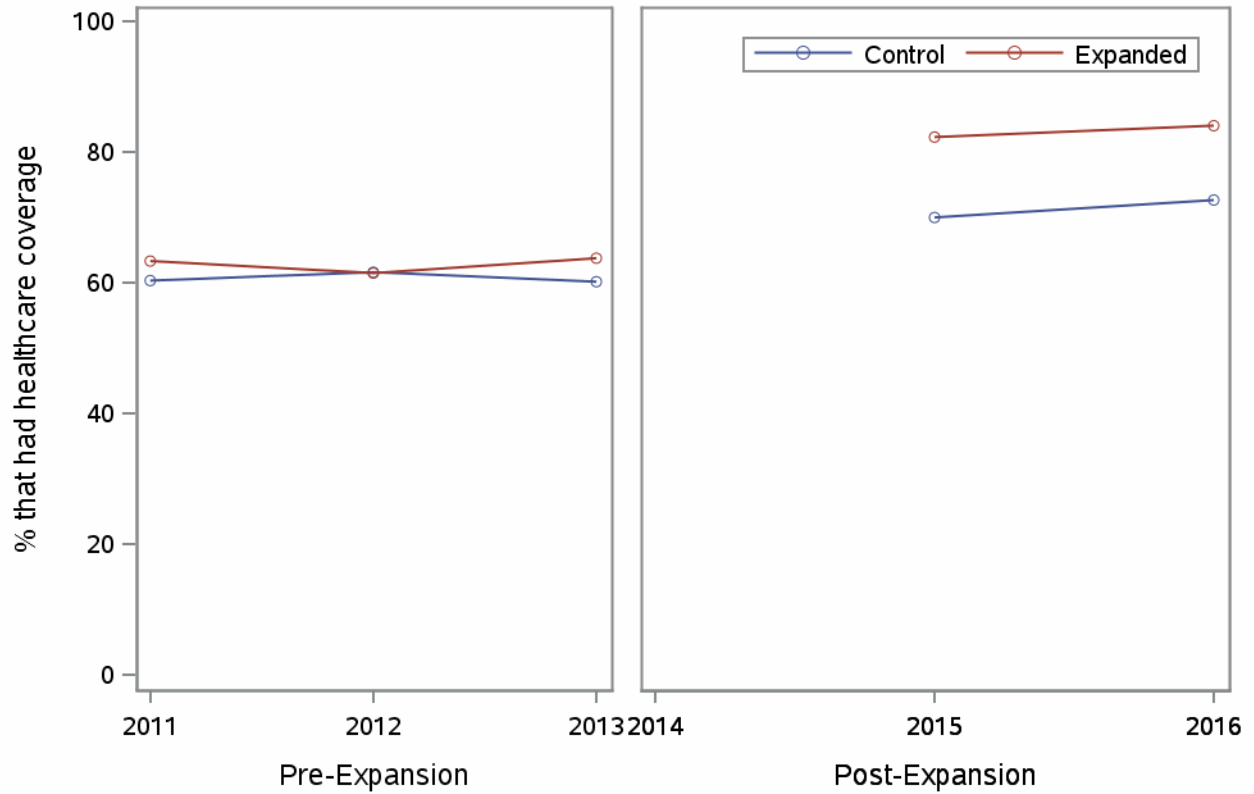

### Parallel Trends Assumption Check: Avoided Seeking Care Due to Cost

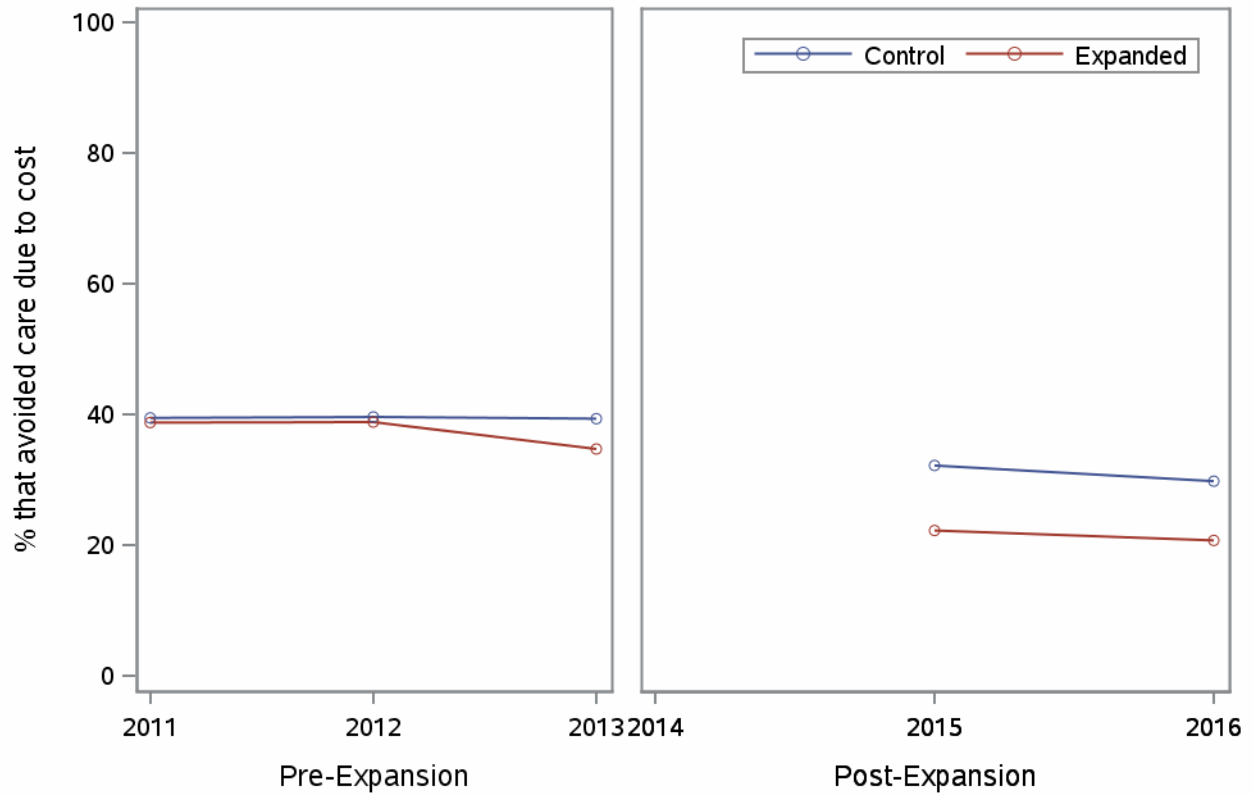

### Parallel Trends Assumption Check: Check-up in Last Year

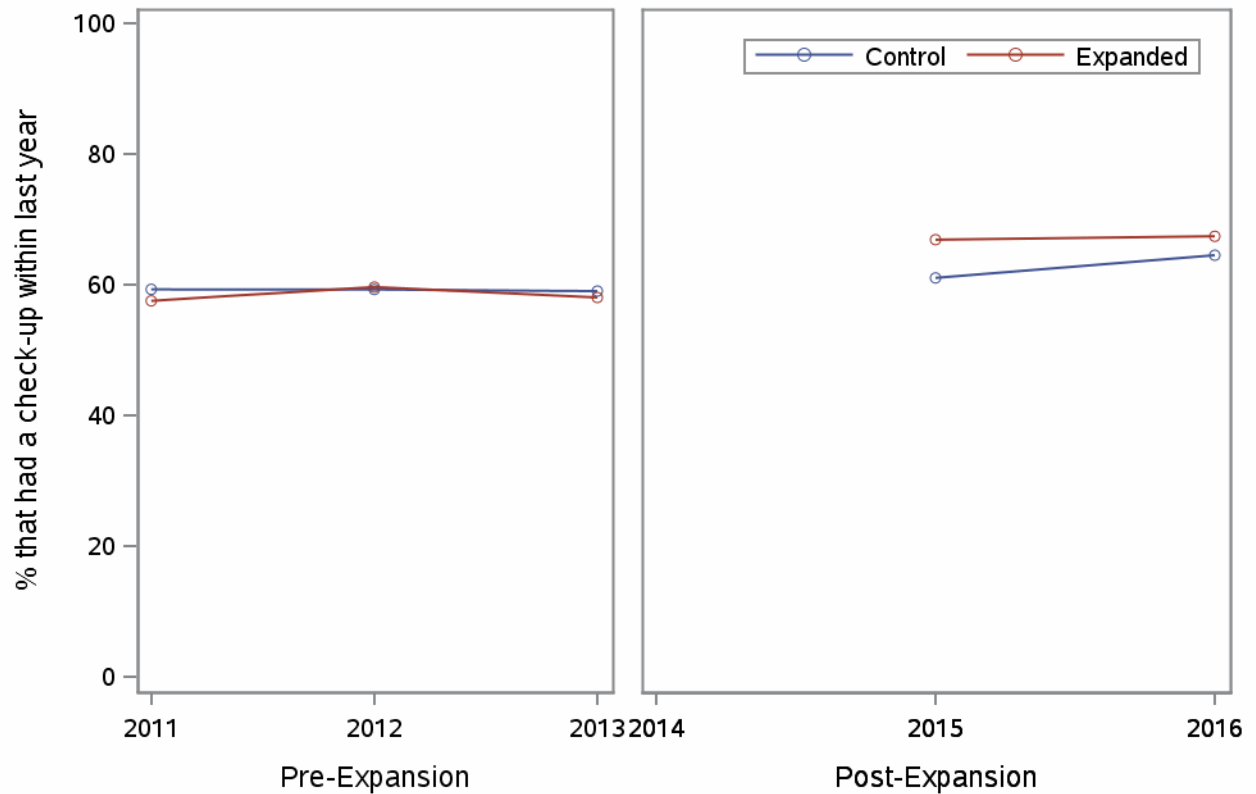

### Parallel Trends Assumption Check: Blood Cholesterol Check

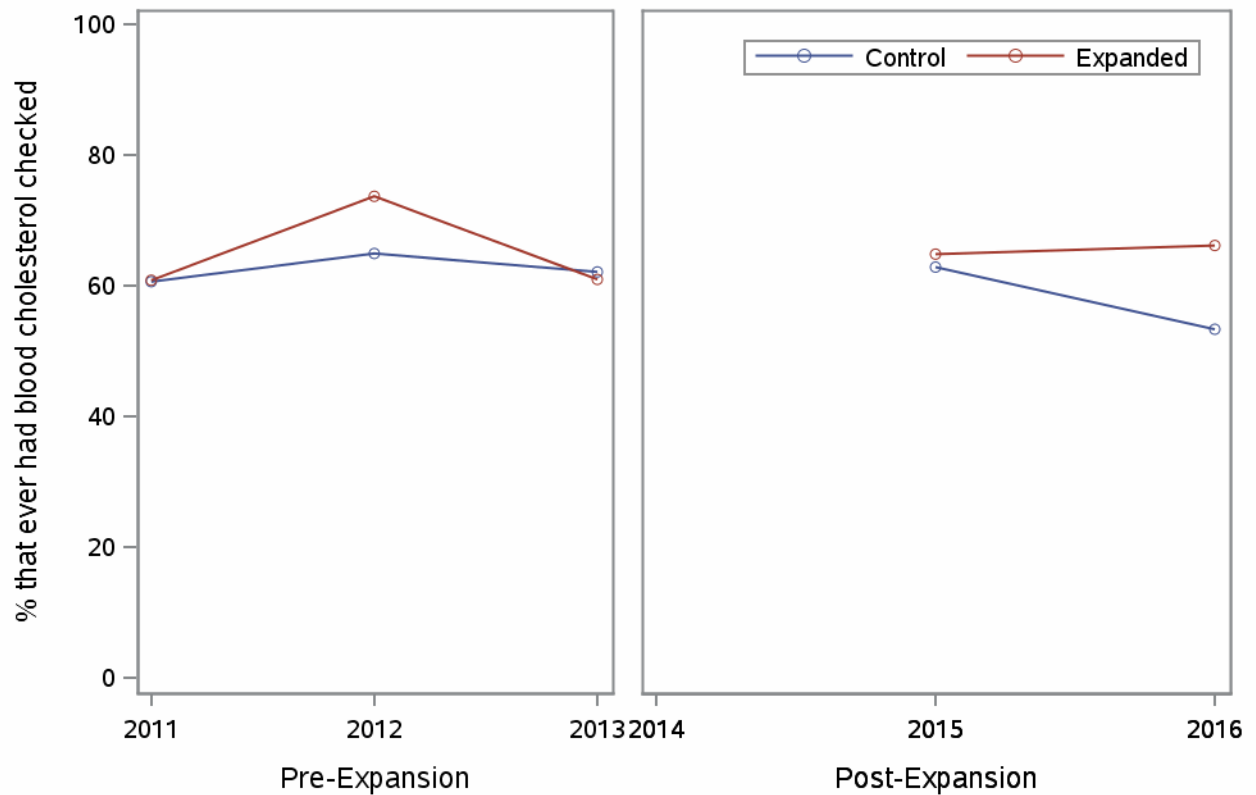

### Parallel Trends Assumption Check: Blood Cholesterol Checked in Prior Year

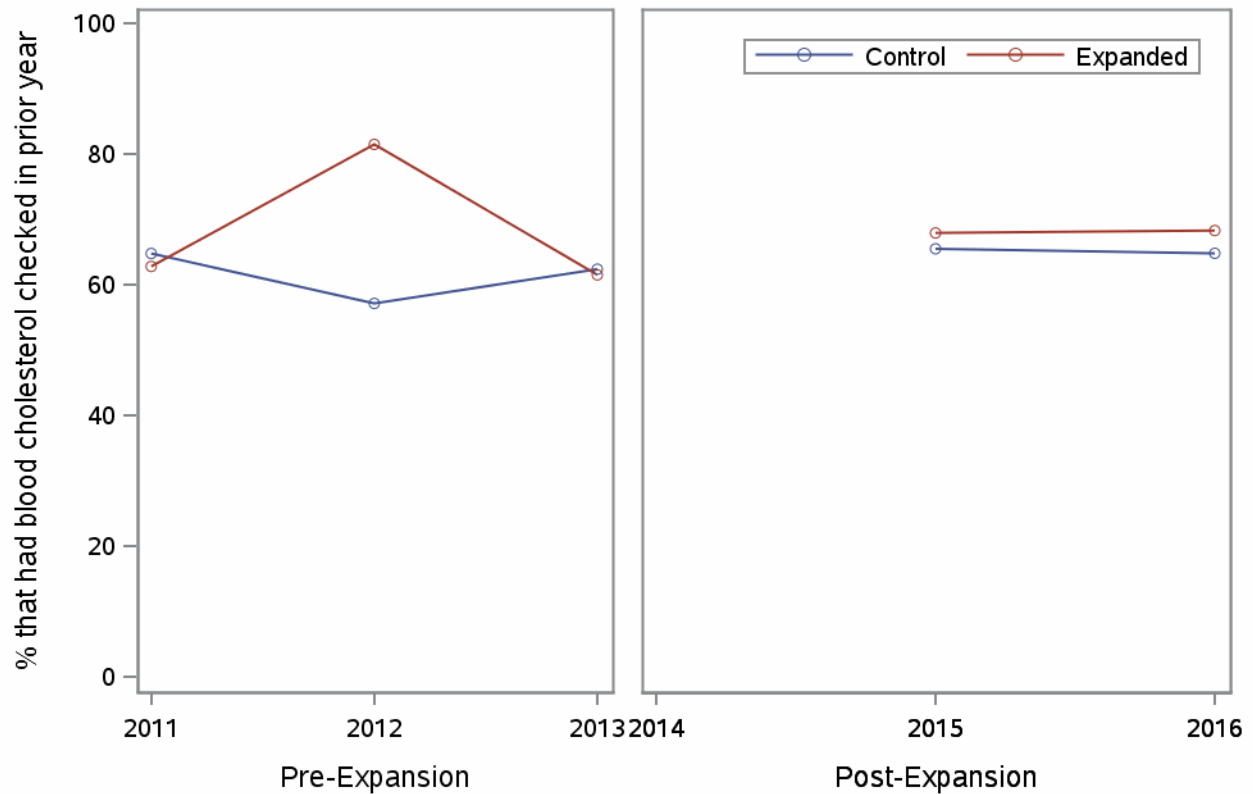

### Parallel Trends Assumption Check: Self-Reported Health

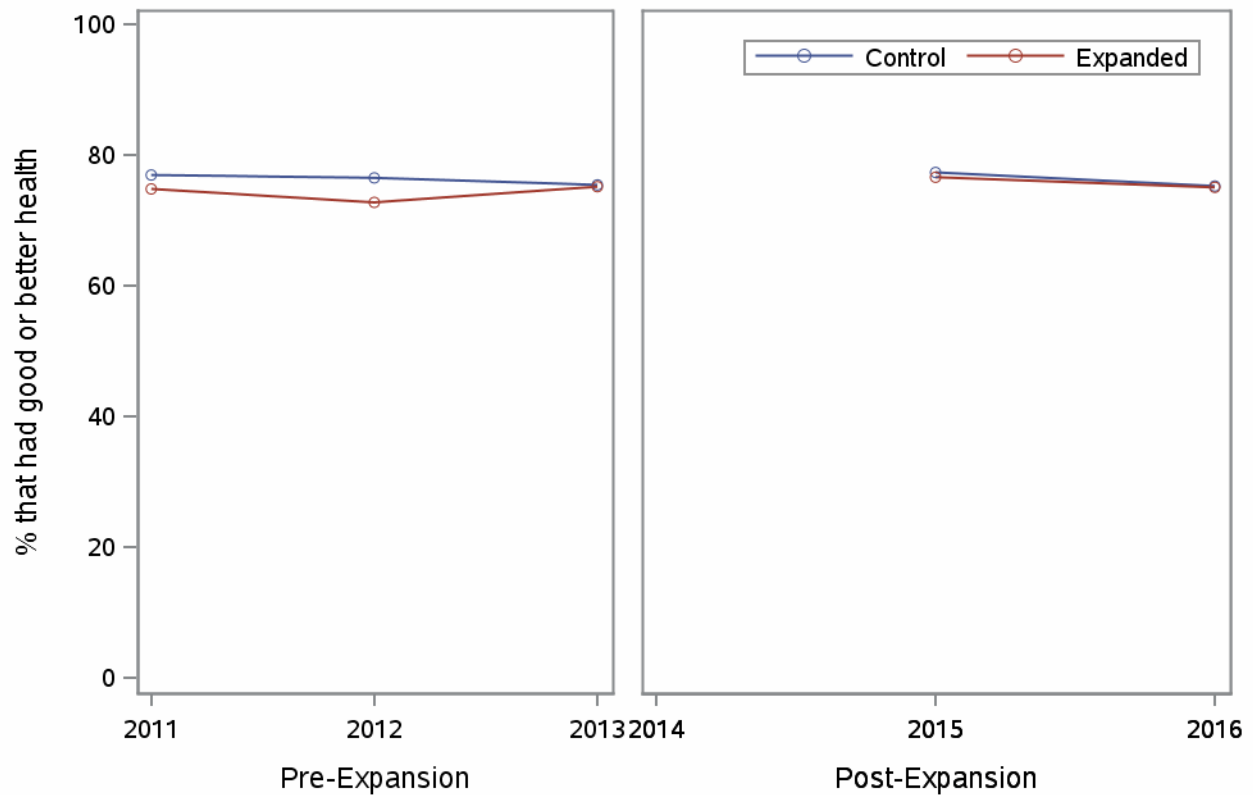

### Parallel Trends Assumption Check: Physical Health Distress

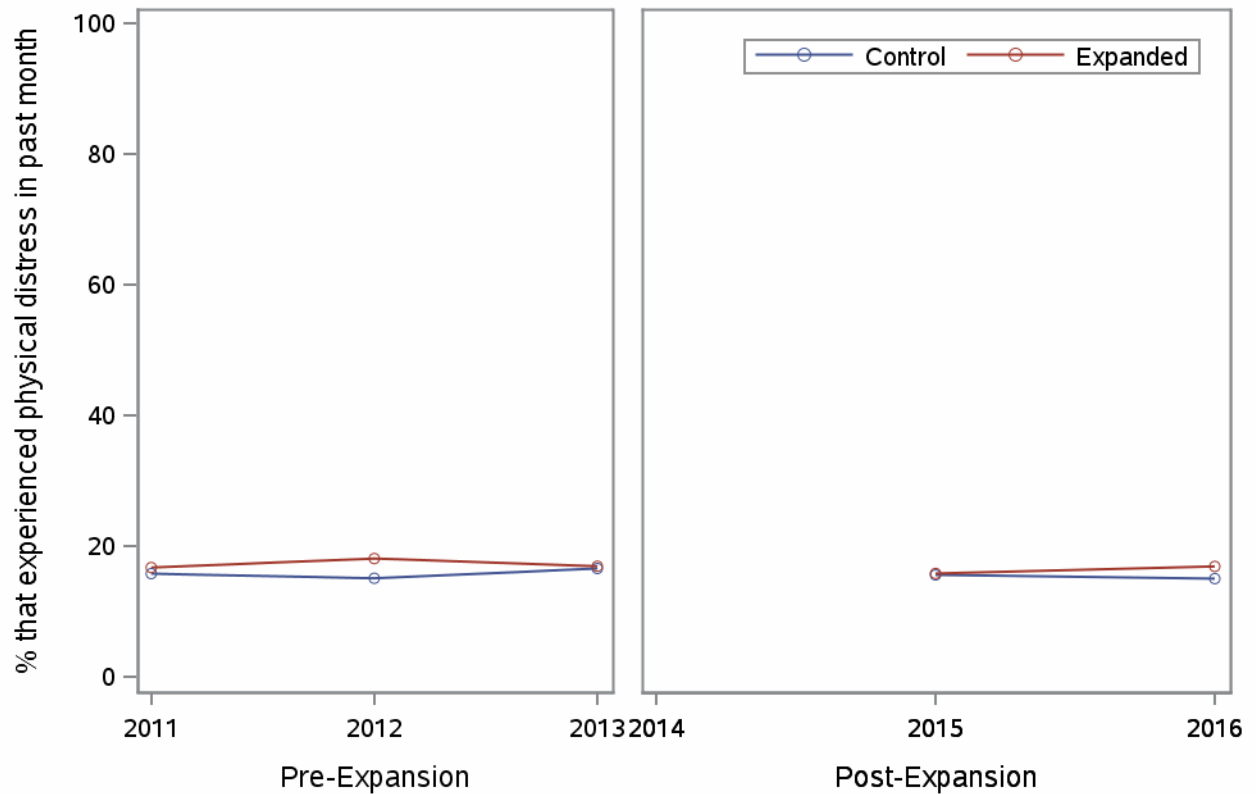

### Parallel Trends Assumption Check: Mental Health Distress

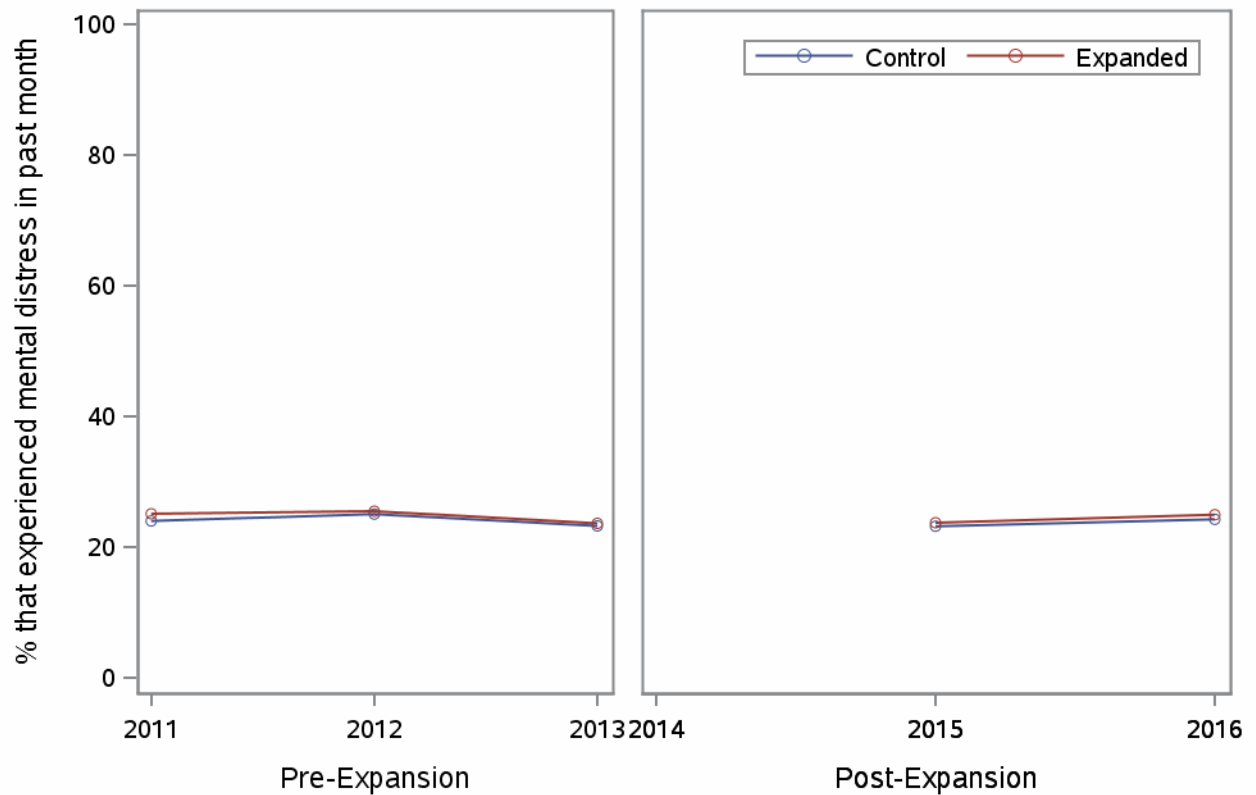

### Parallel Trends Assumption Check: High Blood Pressure (BP)

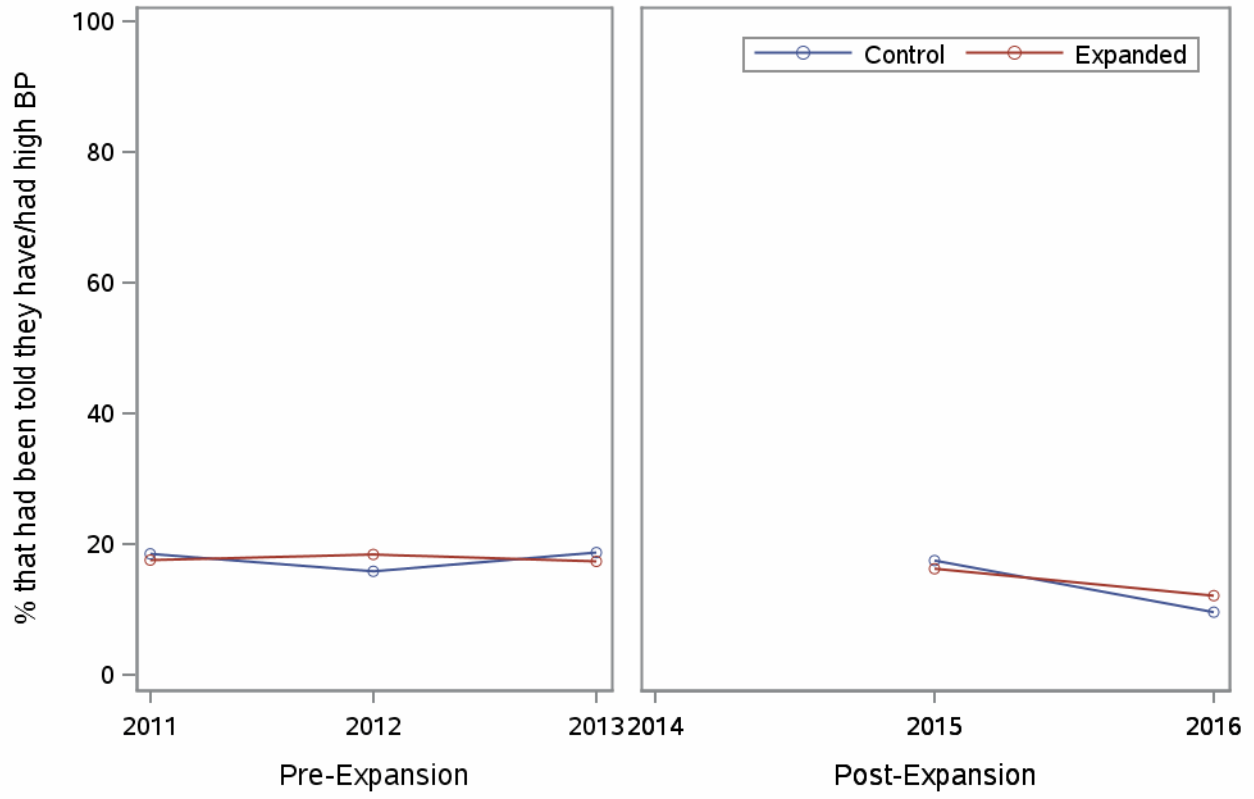

### Parallel Trends Assumption Check: High Cholesterol

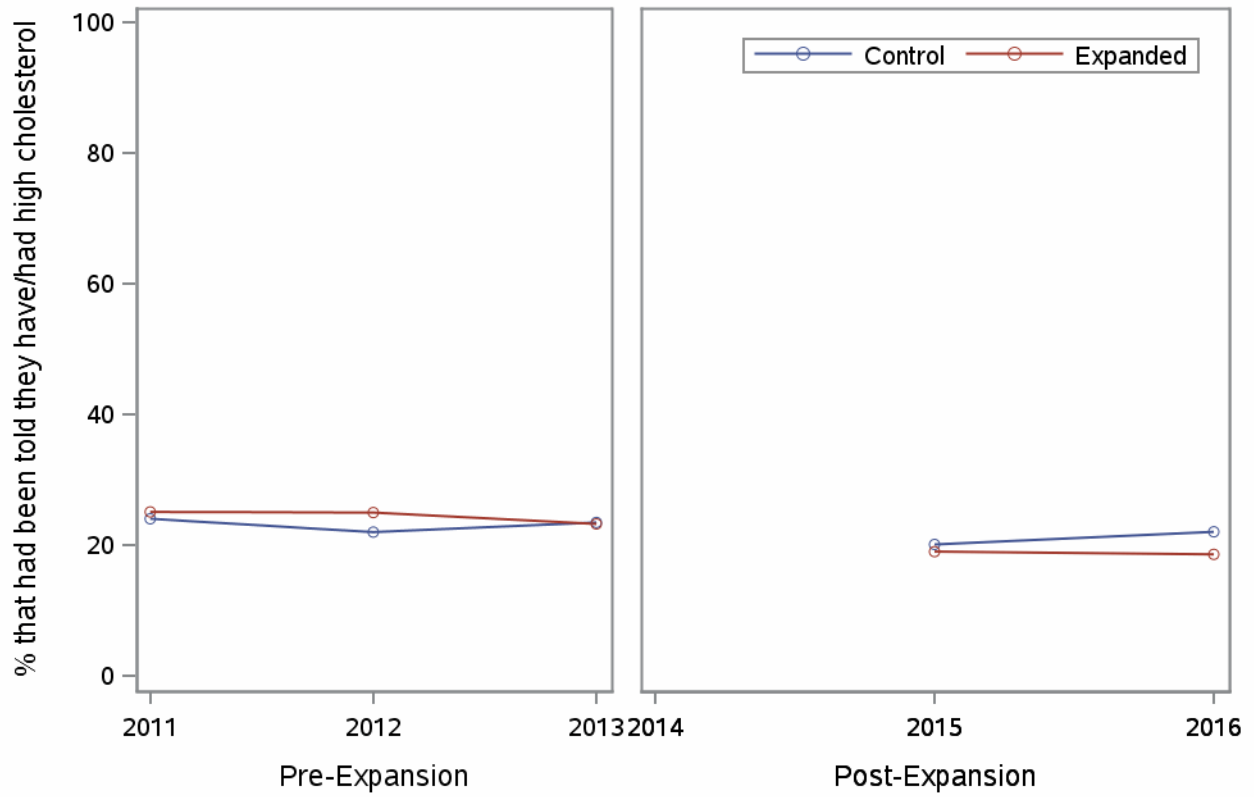

### Parallel Trends Assumption Check: Diabetes

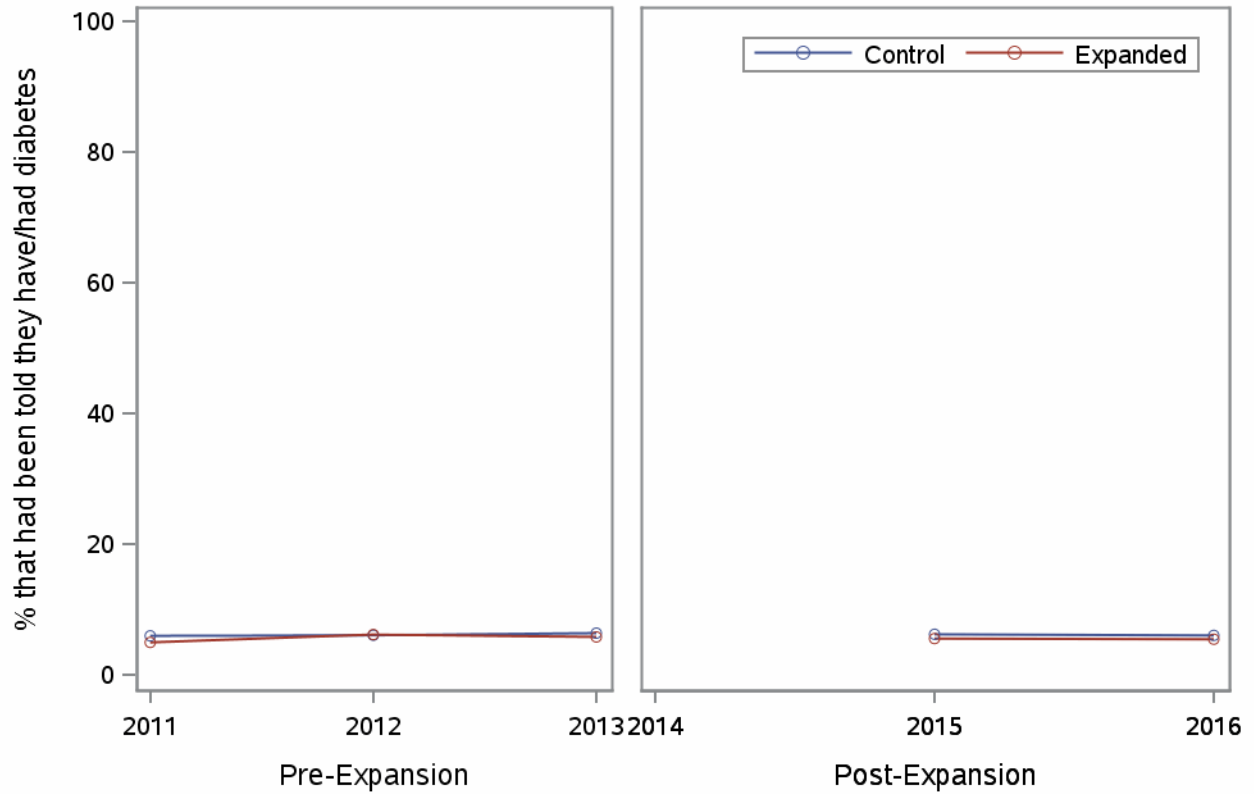

### Parallel Trends Assumption Check: Pre-Diabetes (or Borderline Diabetes)

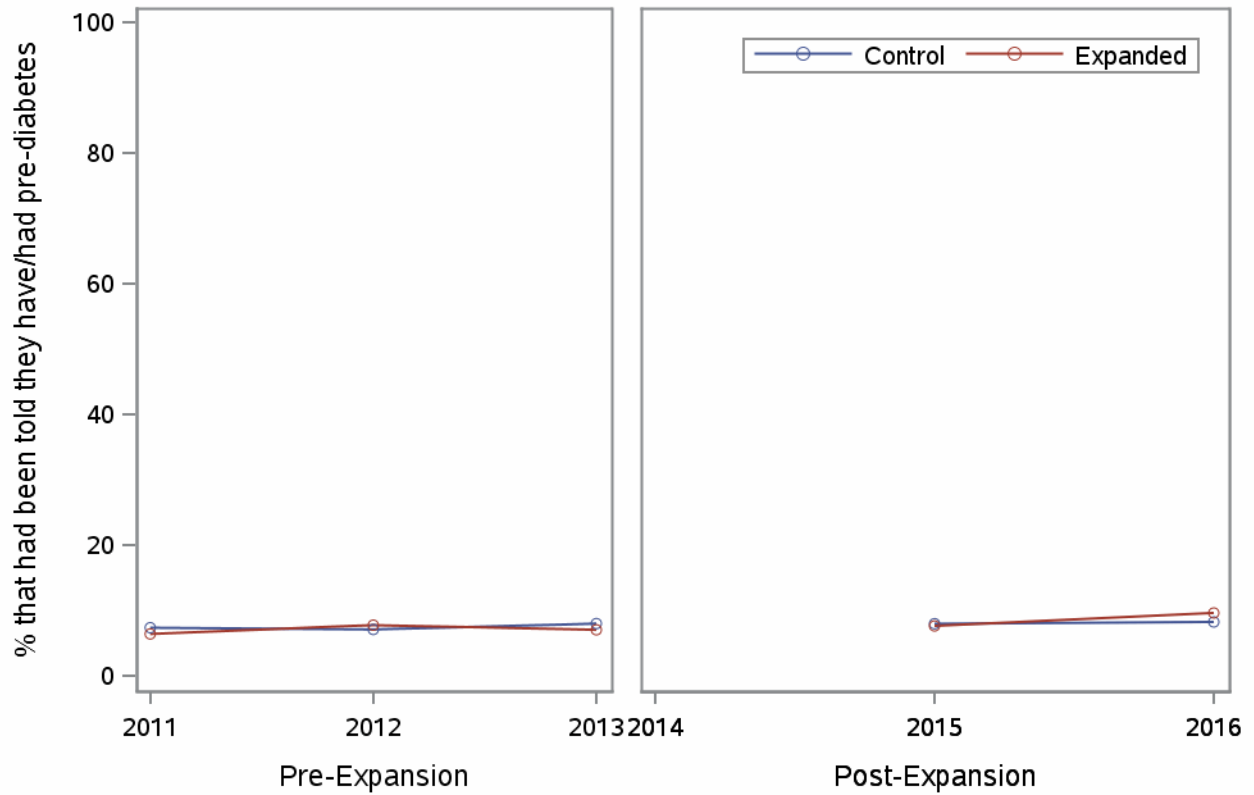

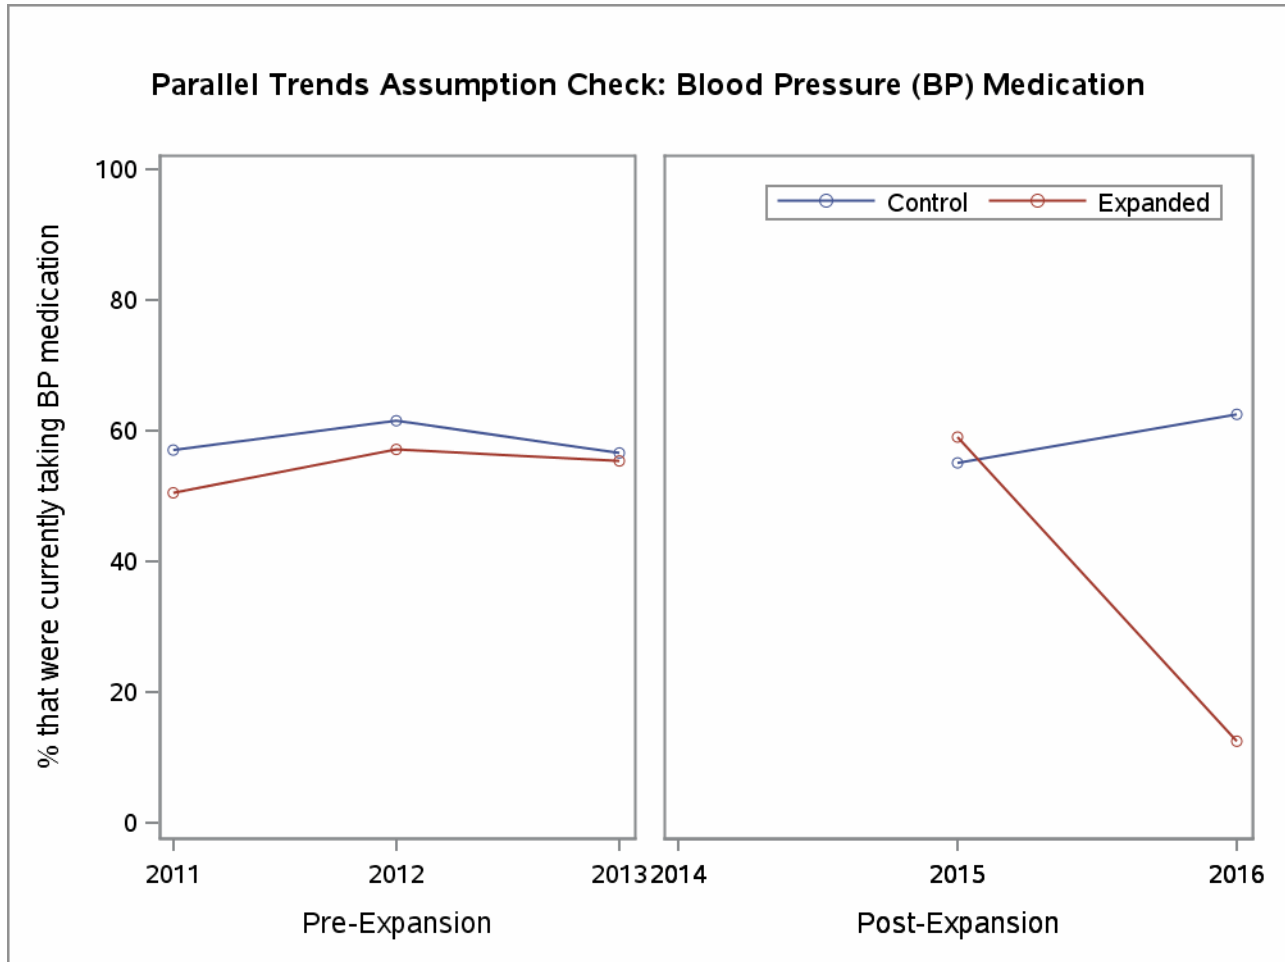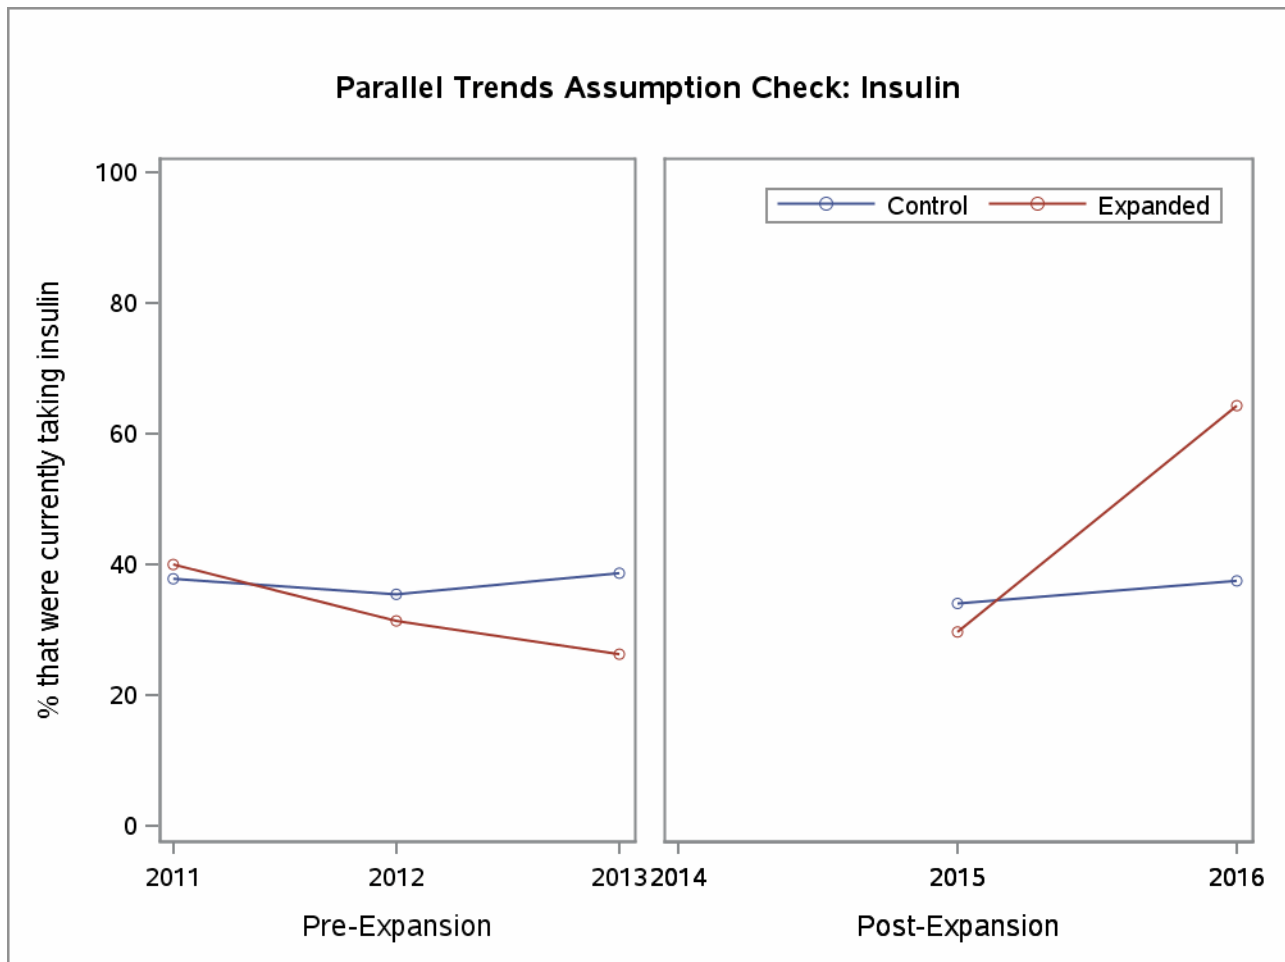

### Parallel Trends Assumption Check: Smoking Cessation Attempts

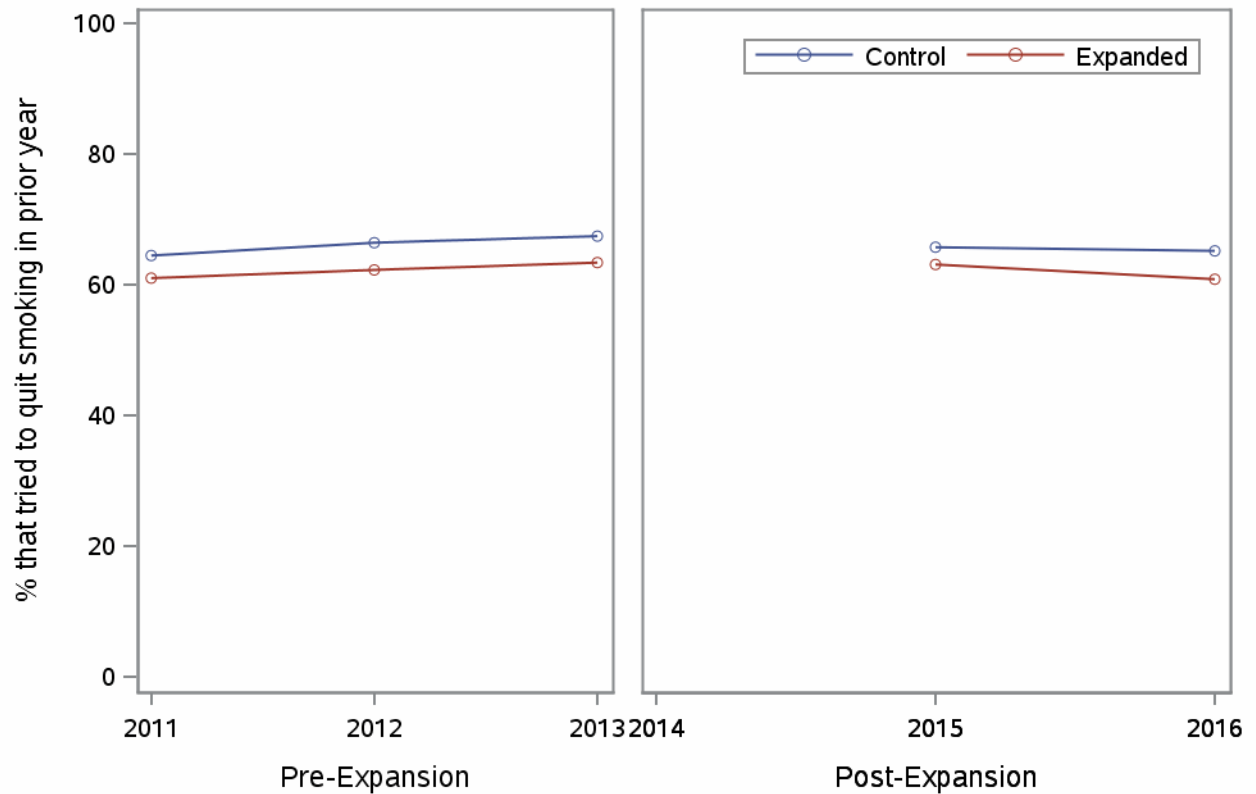

### Parallel Trends Assumption Check: BMI Category

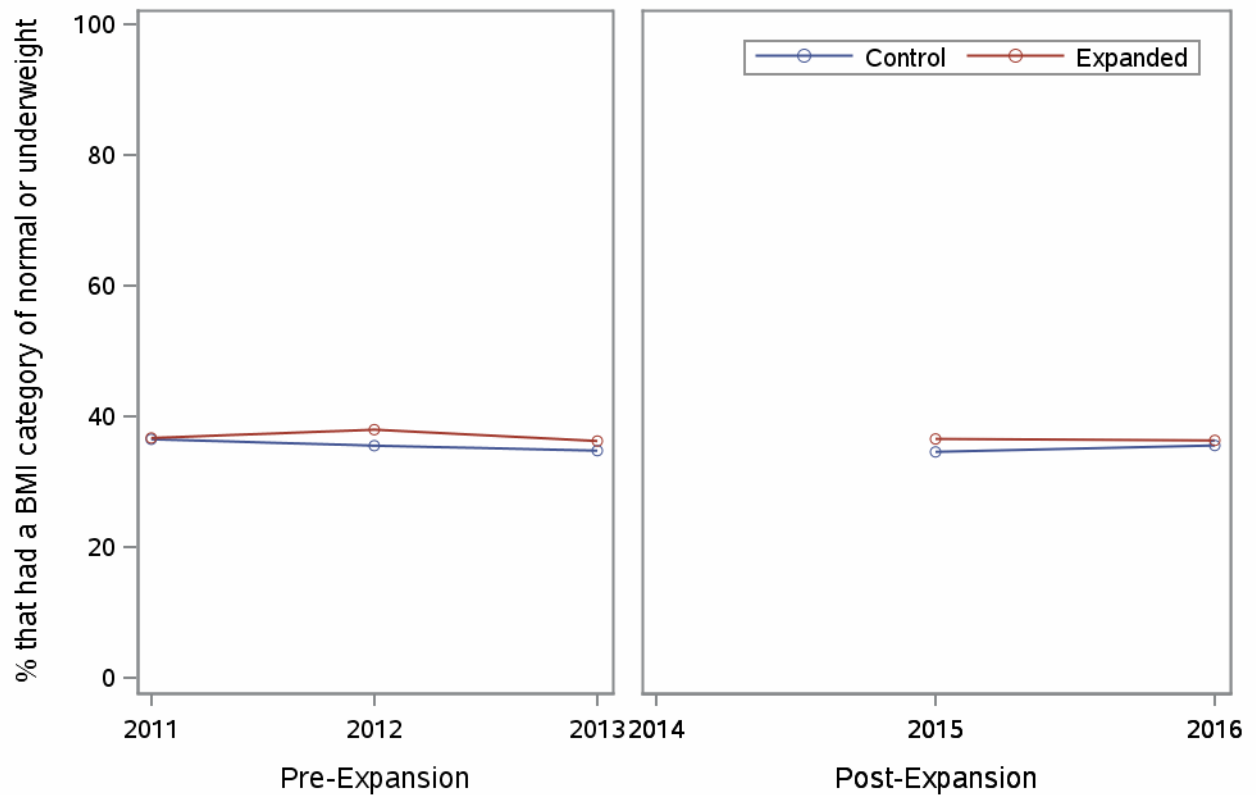



### Parallel Trends Assumption Check: Binge Drinking

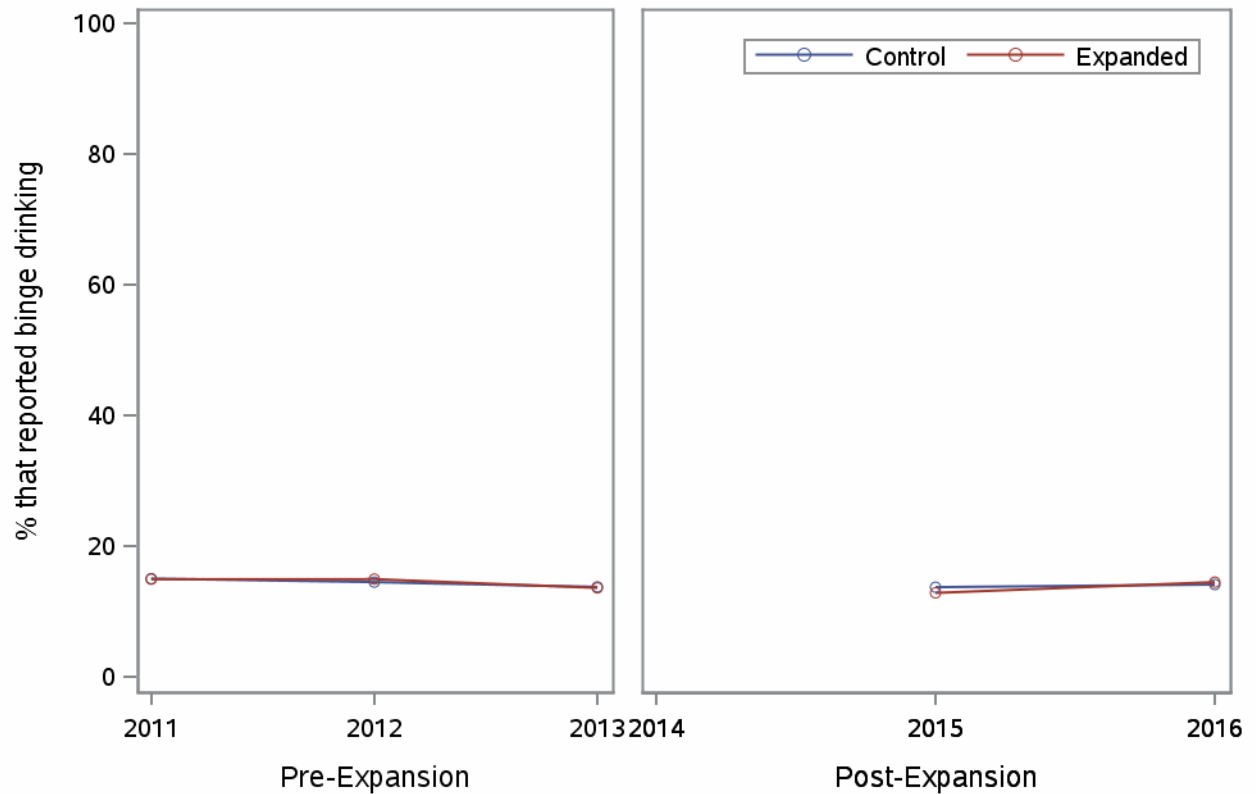

### Parallel Trends Assumption Check: Heavy Drinking

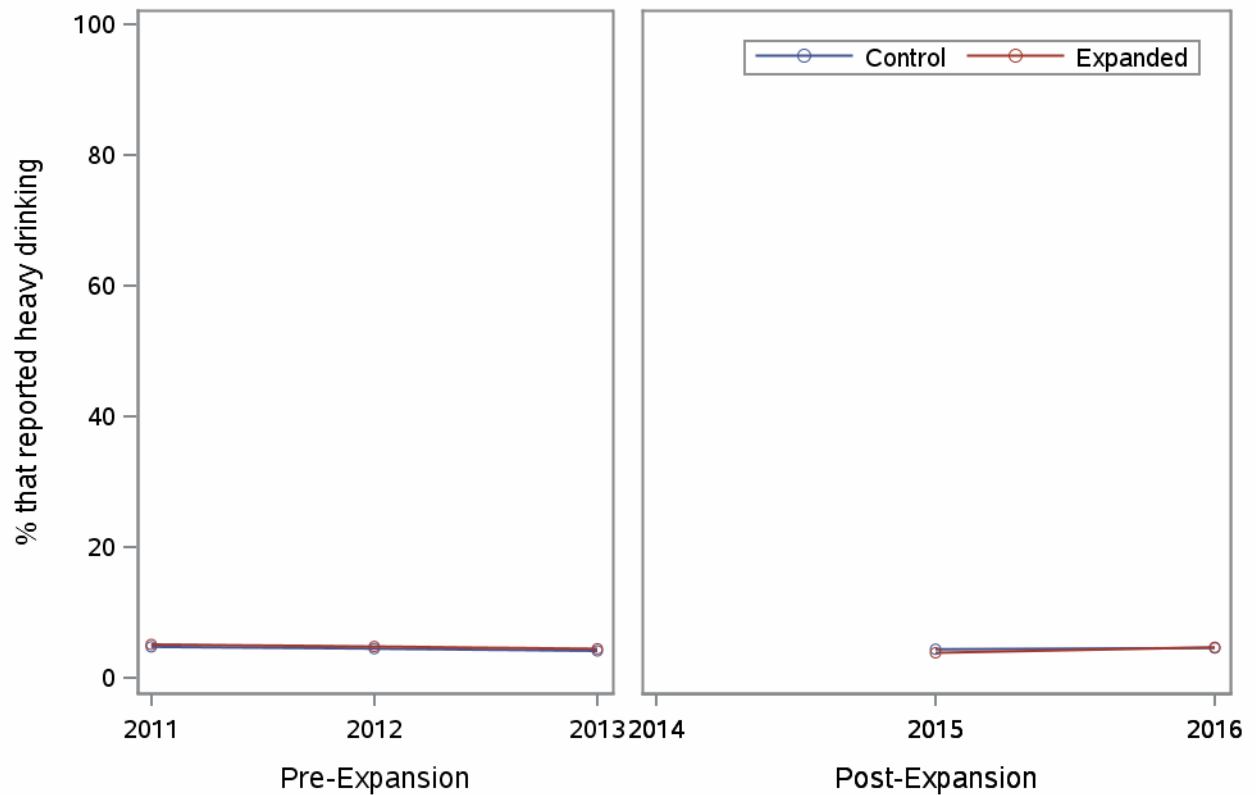

Supplement: NIHMS1543952-supplement-1.pdf [file NIHMS1543952-supplement-1.pdf]
